# Supplementary material for: An efficient fluorescent nano-sensor of N-doped carbon dots for the determination of 2,4,6-trinitrophenol and other applications
Source: Royal Society of Chemistry journal article supplement (doi:10.1039/d0ay01702g), 2020-01-01
Supplement: d0ay01702g1.pdf [file d0ay01702g1.pdf]

## Supplementary Information

### An efficient fluorescent nano-sensor of N-doped carbon dots for the determination of 2,4,6-trinitrophenol and other applications

#### Captions to support figures

Fig. S1. Effect of (A) storage time, (B) pH and (C) NaCl concentration on the fluorescence intensity of the CDs.  $C_{\text{CDs}} = 0.40 \text{ mg/mL}$

Fig. S2. Effect of (A) pH and (B) reaction time on the fluorescence intensity of the CDs/TNP.  $C_{\text{CDs}} = 0.40 \text{ mg/mL}$ ,  $C_{\text{TNP}} = 40 \text{ }\mu\text{mol/L}$

Fig. S3. Cell viability test of HepG2 cells incubated with different concentration of CDs solution (mean% $\pm$ SD, n=6)

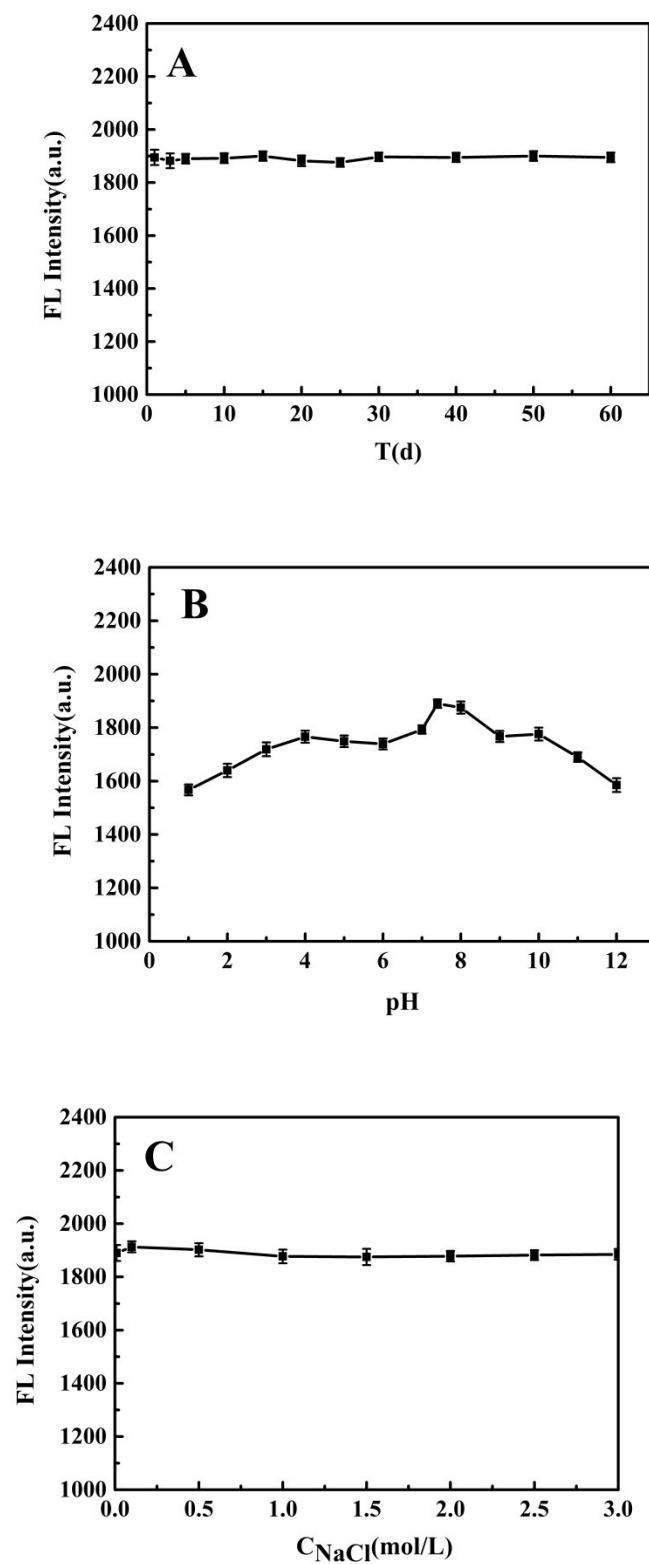

Figure S1

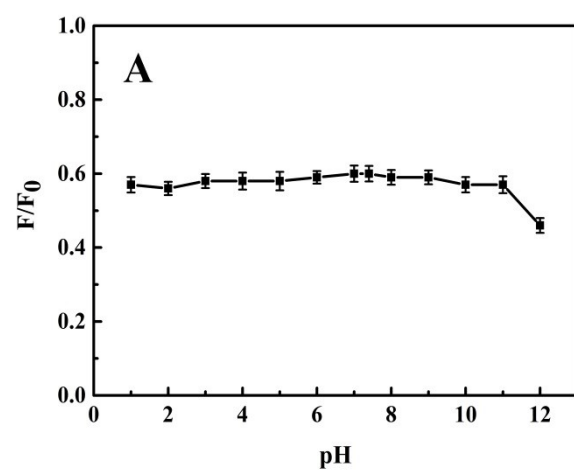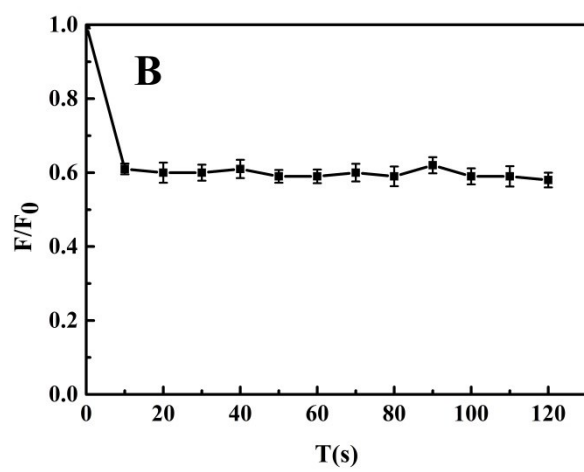

Figure S2

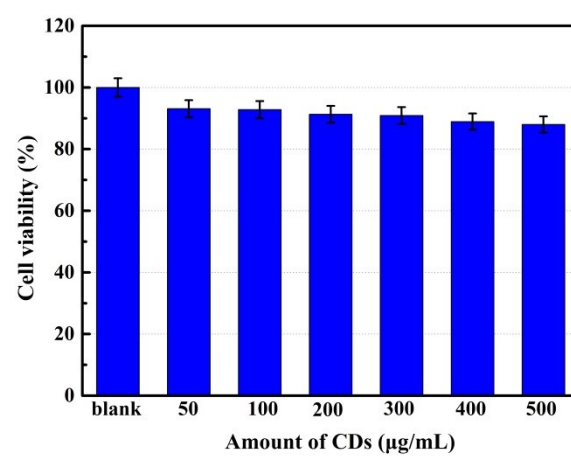

Figure S3
